# Supplementary material for: Skimmed Goat’s Milk Powder Enriched with Grape Pomace Seed Extract: Phenolics and Protein Characterization and Antioxidant Properties
Source: MDPI journal article supplement (doi:10.3390/biom11070965), 2021-06-30
Supplement: s1 [file s1]

# Skimmed goat milk powder enriched with grape pomace seed extract: Phenolics and protein characterization and antioxidant properties

Danijel D. Milinčić<sup>1</sup>, Aleksandar Ž. Kostić<sup>1</sup>, Uroš M. Gašić<sup>2</sup>, Steva Lević<sup>1</sup>, Slađana P. Stanojević<sup>1</sup>, Miroljub B. Barać<sup>1</sup>, Živoslav Lj. Tešić<sup>3</sup>, Viktor Nedović<sup>1</sup>, and Mirjana B. Pešić<sup>1,\*</sup>

**Table S1.** Determination characteristics of phenolic compounds and analytical performance of the method using UHPLC- MS/MS Orbitrap

| Compound name             | Linear regression<br>( $y=a+b*x$ ) | $r^2$  | LOD<br>(mg/L) | LOQ<br>(mg/L) | Linear range<br>(mg/L) |
|---------------------------|------------------------------------|--------|---------------|---------------|------------------------|
| Gallic acid               | $y = -2.08E+7 + 3.86E+7*x$         | 0.9908 | 0.17          | 0.56          | 0.50 - 2.00            |
| Caffeic acid              | $y = -1.30E+6 + 2.43E+7*x$         | 0.9939 | 0.17          | 0.58          | 0.01 - 1.90            |
| Catechin                  | $y = -3.56E+4 + 3.60E+5*x$         | 0.9977 | 0.08          | 0.26          | 0.15 - 1.50            |
| Quercetin-3-O-glucoside   | $y = 7.13E+5 + 3.33E+7*x$          | 0.9986 | 0.08          | 0.28          | 0.01 - 2.00            |
| Malvidin-3-O-glucoside    | $y = -1.04E+4 + 6.94E+5*x$         | 0.9931 | 0.09          | 0.31          | 0.05 - 1.00            |
| Delphinidin 3-O-glucoside | $y = -1.73E+4 + 4.26E+5*x$         | 0.9988 | 0.04          | 0.13          | 0.05 - 1.00            |
| Peonidin 3-O-glucoside    | $y = -7.44E+3 + 2.86E+5*x$         | 0.9916 | 0.10          | 0.33          | 0.05 - 1.00            |
